# Supplementary material for: Branched PdAu nanowires with superior electrocatalytic formic acid oxidation activities
Source: Royal Society of Chemistry journal article supplement (doi:10.1039/c7ra02115a), 2017-01-01
Supplement: c7ra02115a1.pdf [file c7ra02115a1.pdf]

## Supporting Information

### **Branched PdAu nanowires with superior electrocatalytic formic acid oxidation activities**

Ying-Xia Wang <sup>a,b,\*</sup>, Zhong Xiong <sup>a</sup>, Yan-Zhi Xia <sup>a</sup>

<sup>a</sup> Collaborative Innovation Center for Marine Biomass Fibers, Materials and Textiles of Shandong Province, Qingdao University, Qingdao 266071, P R China

<sup>b</sup> Materials Science and Engineering College, Qingdao University, Qingdao 266071, P R China

---

\* Corresponding authors.

E-mail *address*: yxwang@qdu.edu.cn (Y.X. Wang)

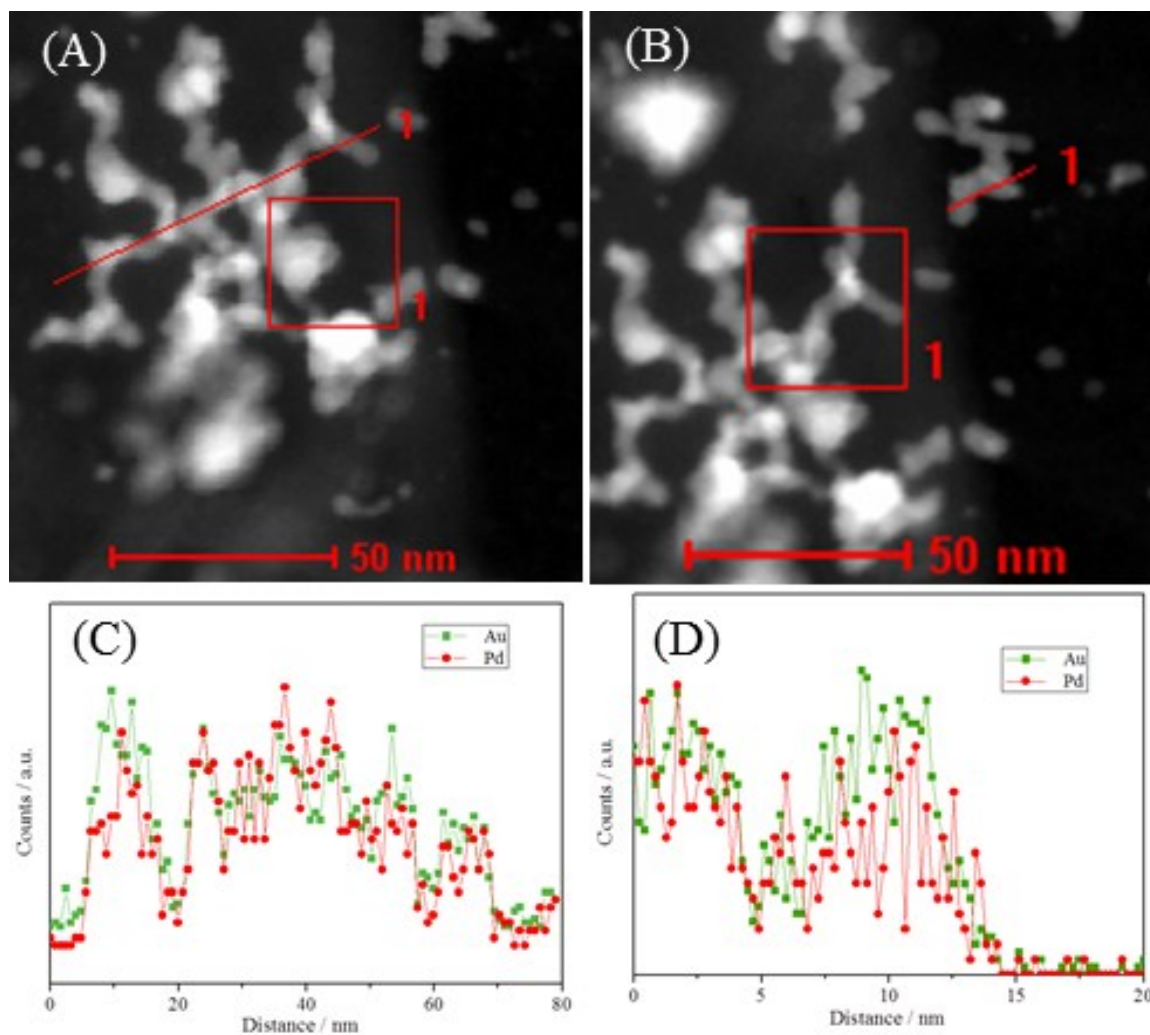

Figure S1. (A, B) HAADF-STEM images of PdAu/graphene, (C, D) STEM-EDS line-scan profile of PdAu/graphene.

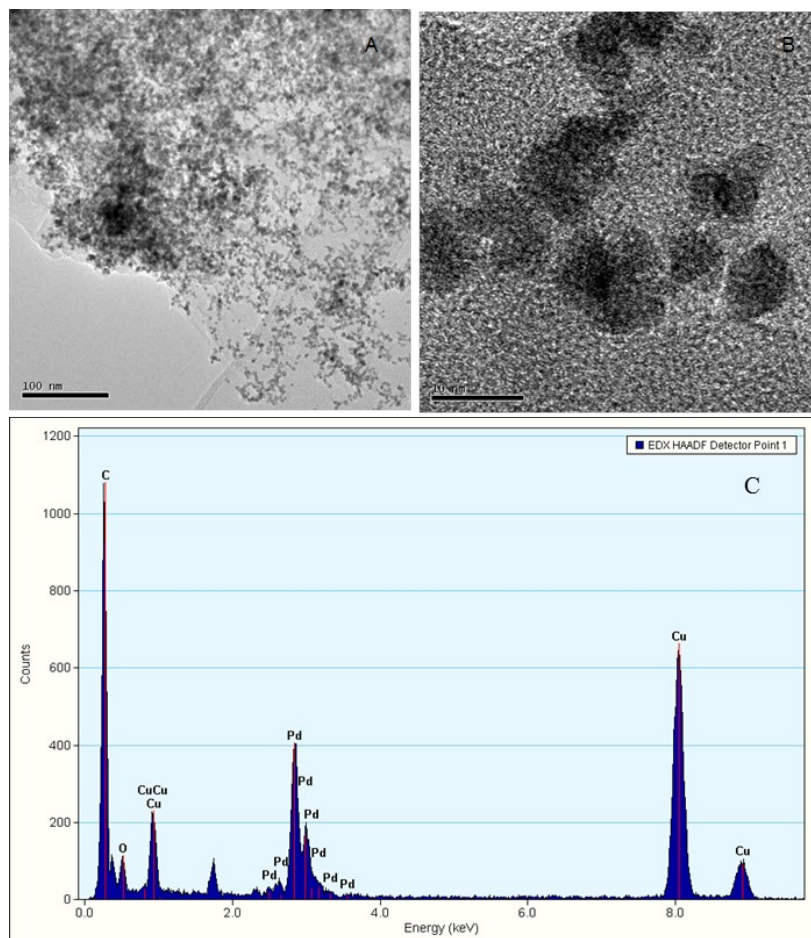

**Fig. S2** (A-B) TEM micrographs of Pd/graphene at different magnifications. The scale bars: (A) 100 nm and (B) 10 nm. (C) EDS of Pd/graphene.

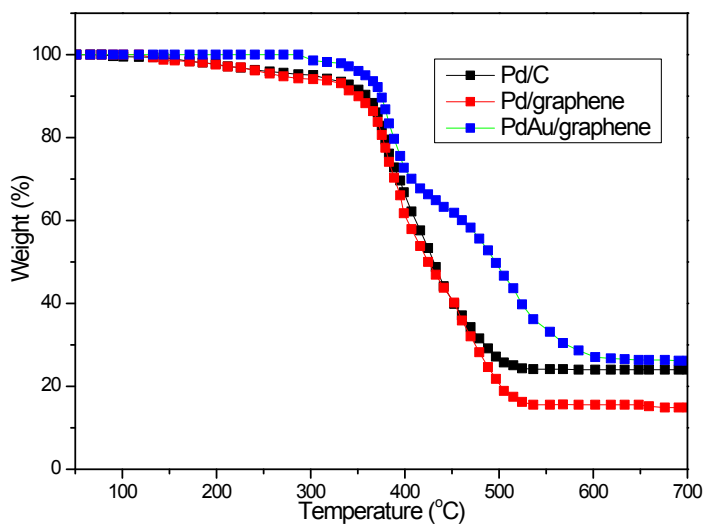

**Fig. S3** Thermogravimetric analysis of PdAu/graphene, Pd/graphene and Pd/C

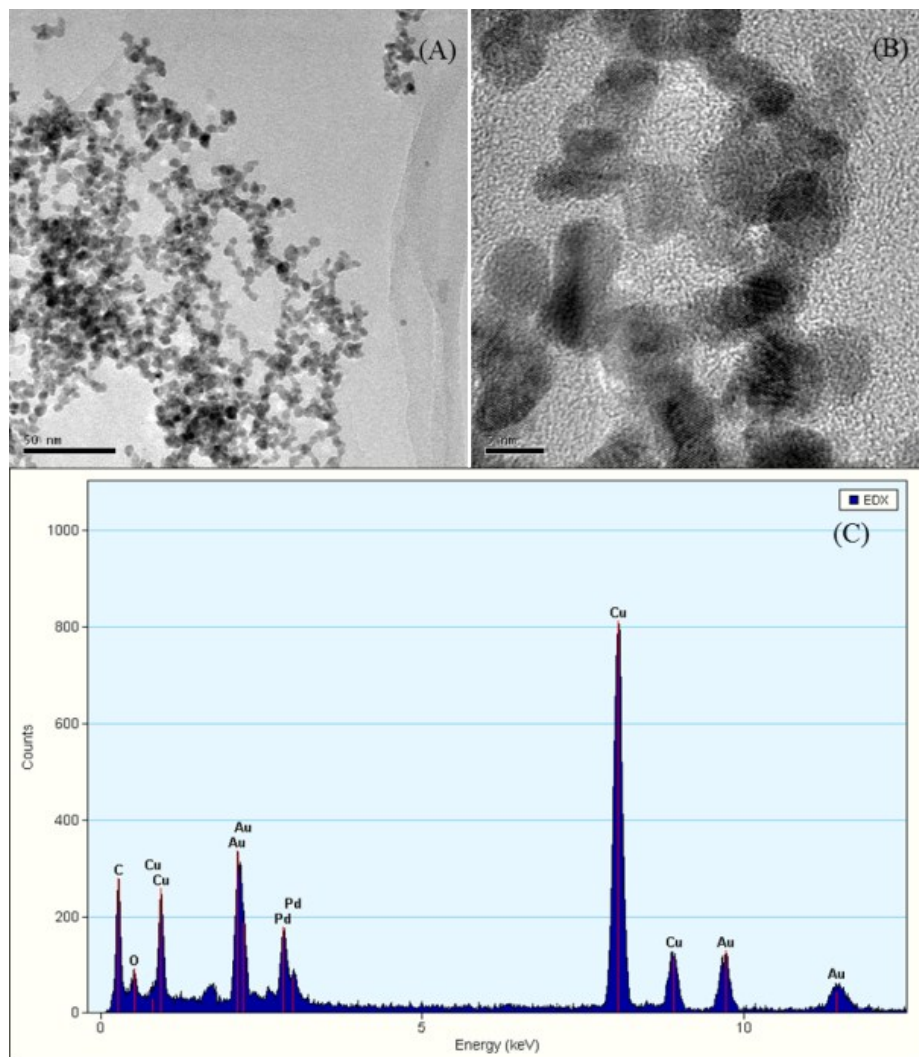

**Figure S4** (A, B, C) TEM, HR-TEM and EDS of PdAu/graphene after 300 cycles of CVs in 0.5 M H<sub>2</sub>SO<sub>4</sub> + 1.0 M HCOOH solution.

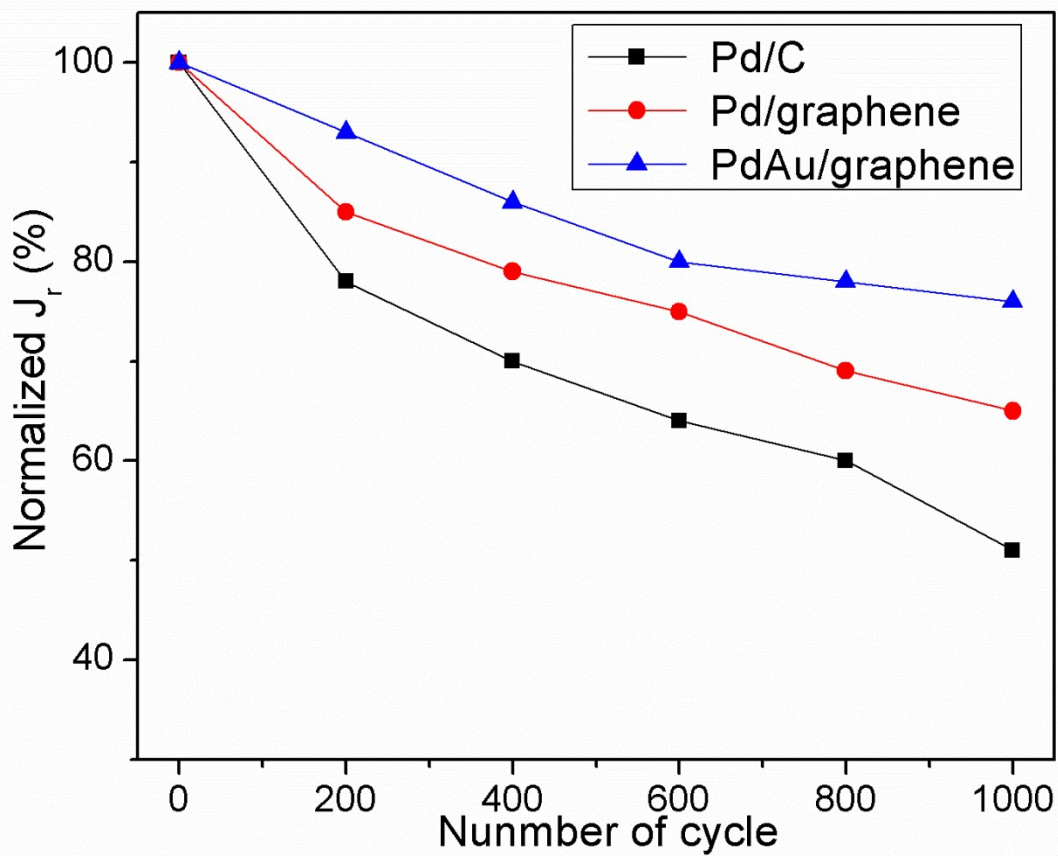

**Figure S5** Loss of ECSA of PdAu/graphene, Pd/graphene and Pd/C catalysts as a function of cycling number.

Table S1 Comparison of activity for formic acid oxidation on various electro-catalysts

| Catalyst                    | ECSA<br>m <sup>2</sup> g <sup>-1</sup> | Mass activity<br>A mg <sup>-1</sup> <sub>Pd</sub> | Specific activity<br>mA m <sup>-2</sup> | Reference |
|-----------------------------|----------------------------------------|---------------------------------------------------|-----------------------------------------|-----------|
| PdNi film                   | 31.9                                   | 1.39                                              | 4.36                                    | 1         |
| Pd/Ni <sub>2</sub> P/C NPs  | 63.6                                   | 1.43                                              | 2.25                                    | 2         |
| Pd NWs                      | 43.1                                   | 1.10                                              | 2.55                                    | 3         |
| Pd/CNT                      | 55.3                                   | 0.75                                              | 1.36                                    | 4         |
| PdAu/C NPs                  | 95.6                                   | 0.52                                              | 0.54                                    | 5         |
| Pd-Co                       | 20.2                                   | 0.27                                              | 1.34                                    | 6         |
| Pd NWs/graphene             | 43.5                                   | 1.81                                              | 4.16                                    | This work |
| Branched Pd-Au NWs/graphene | 40.6                                   | 2.92                                              | 7.19                                    | This work |

## References

- 1 H. Rasouli, S.H. Tabaian, M. Rezaei, *RSC Adv.*, 2016, **6**, 22500-22510.
- 2 J. Chang, L. Feng, C. Liu, W. Xing and X. Hu, *Angew. Chemie Int. Ed.*, 2014, **53**, 122–126.
- 3 W. Hong, J. Wang and E. Wang, *Int. J. Hydrogen Energy*, 2014, **39**, 3226-3230.
- 4 A.B.A.A. Nassr, A. Questschke, E. Koslowski and M. Born, *Electrochim. Acta*, 2013, **102**, 202-211.
- 5 S. Lee, N. Jung, J. Cho, H.-Y. Park, J. Ryu, I. Jang, H. Kim, E. Cho, Y. Park, H.C. Ham, J.H. Jang and S.J. Yoo, *ACS Catal.*, 2014, **4**, 2402-2408.
- 6 L. Zhang, L. Wan, Y. Ma, Y. Chen, Y. Zhou, Y. Tang and T. Lu, *Appl. Catal. B, Environ.*, 2013, **138-139**, 229-235.
